# Supplementary material
Source: Springer Nature journal article supplement (https://www.springermedizin.de/resource/supplementary/12943_2012_1103_MOESM4_ESM.pdf/9552488)

SW480

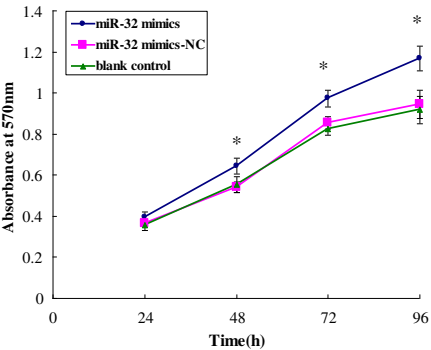

HCT-116

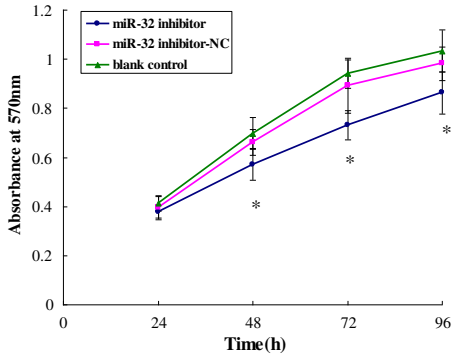

Supplement: MOESM4 [file 9552488]
